# Supplementary material
Source: PubMed Central journal article supplement (PMC4003503)

Figure S1

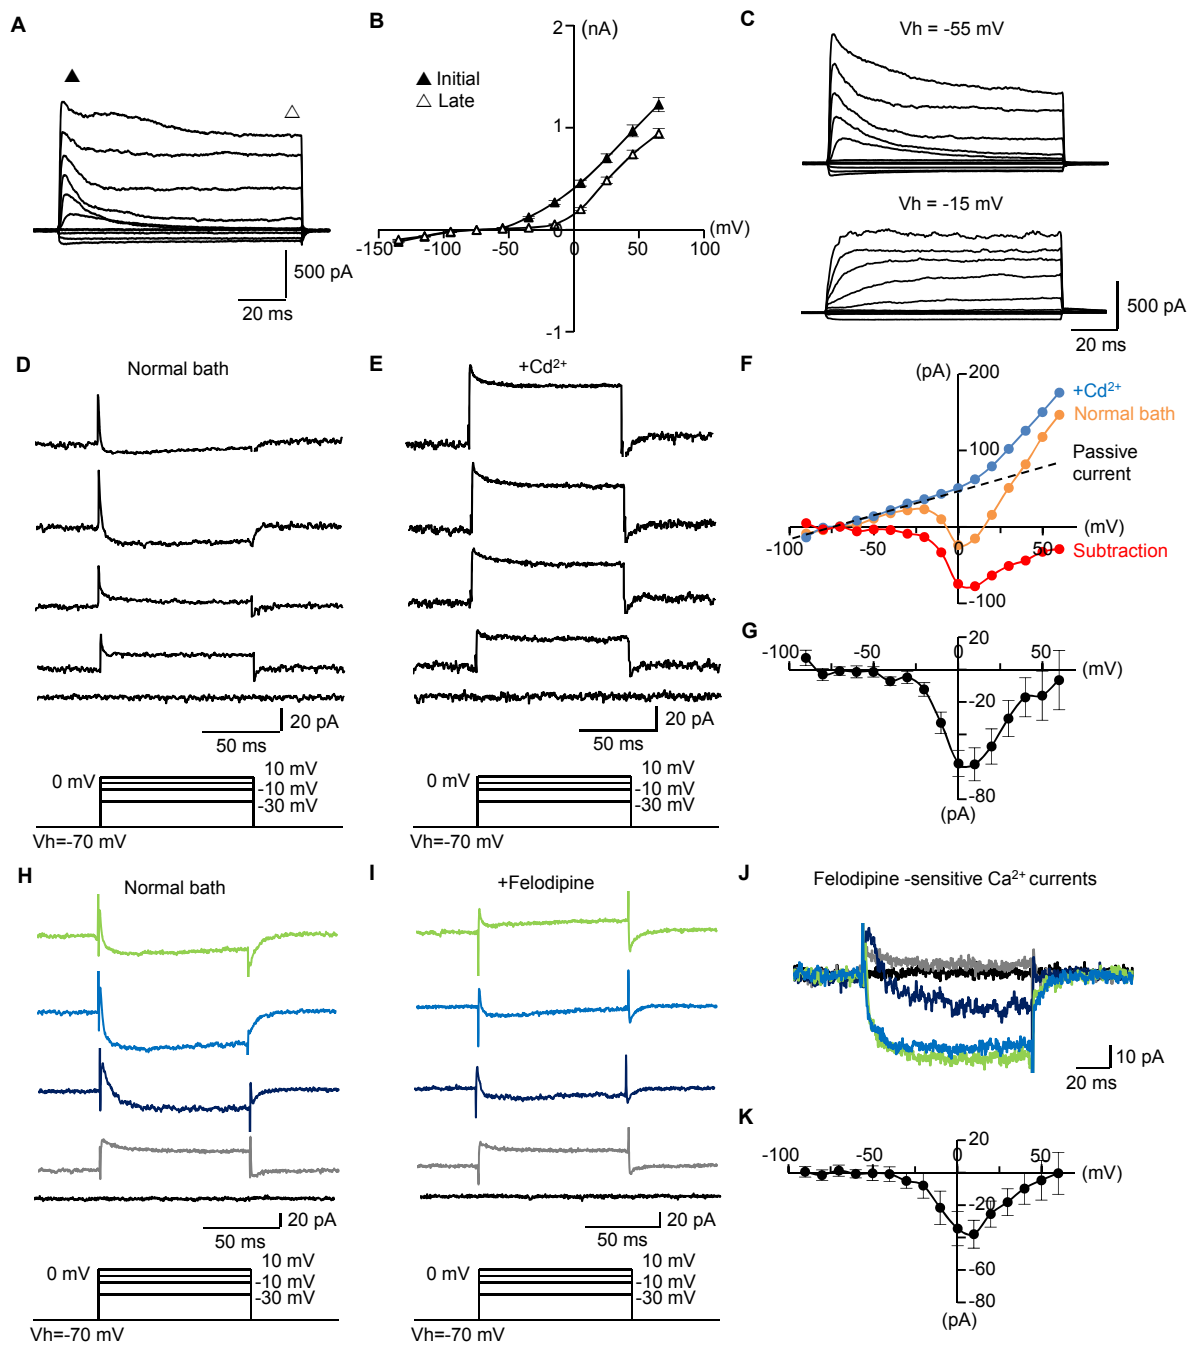

Figure S2

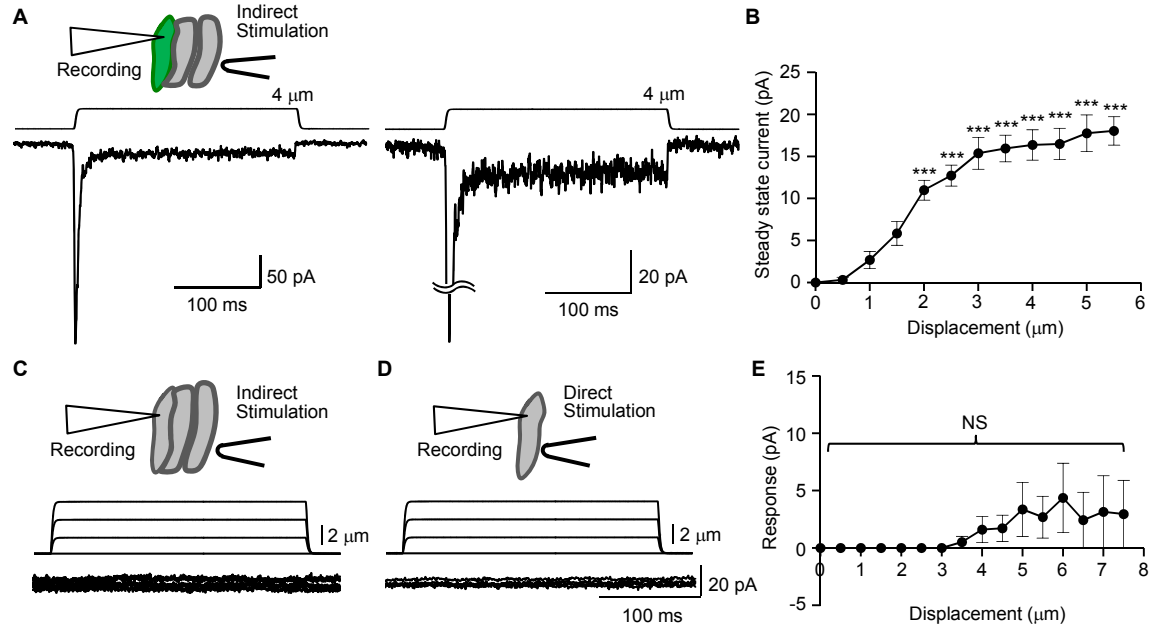

Figure S3

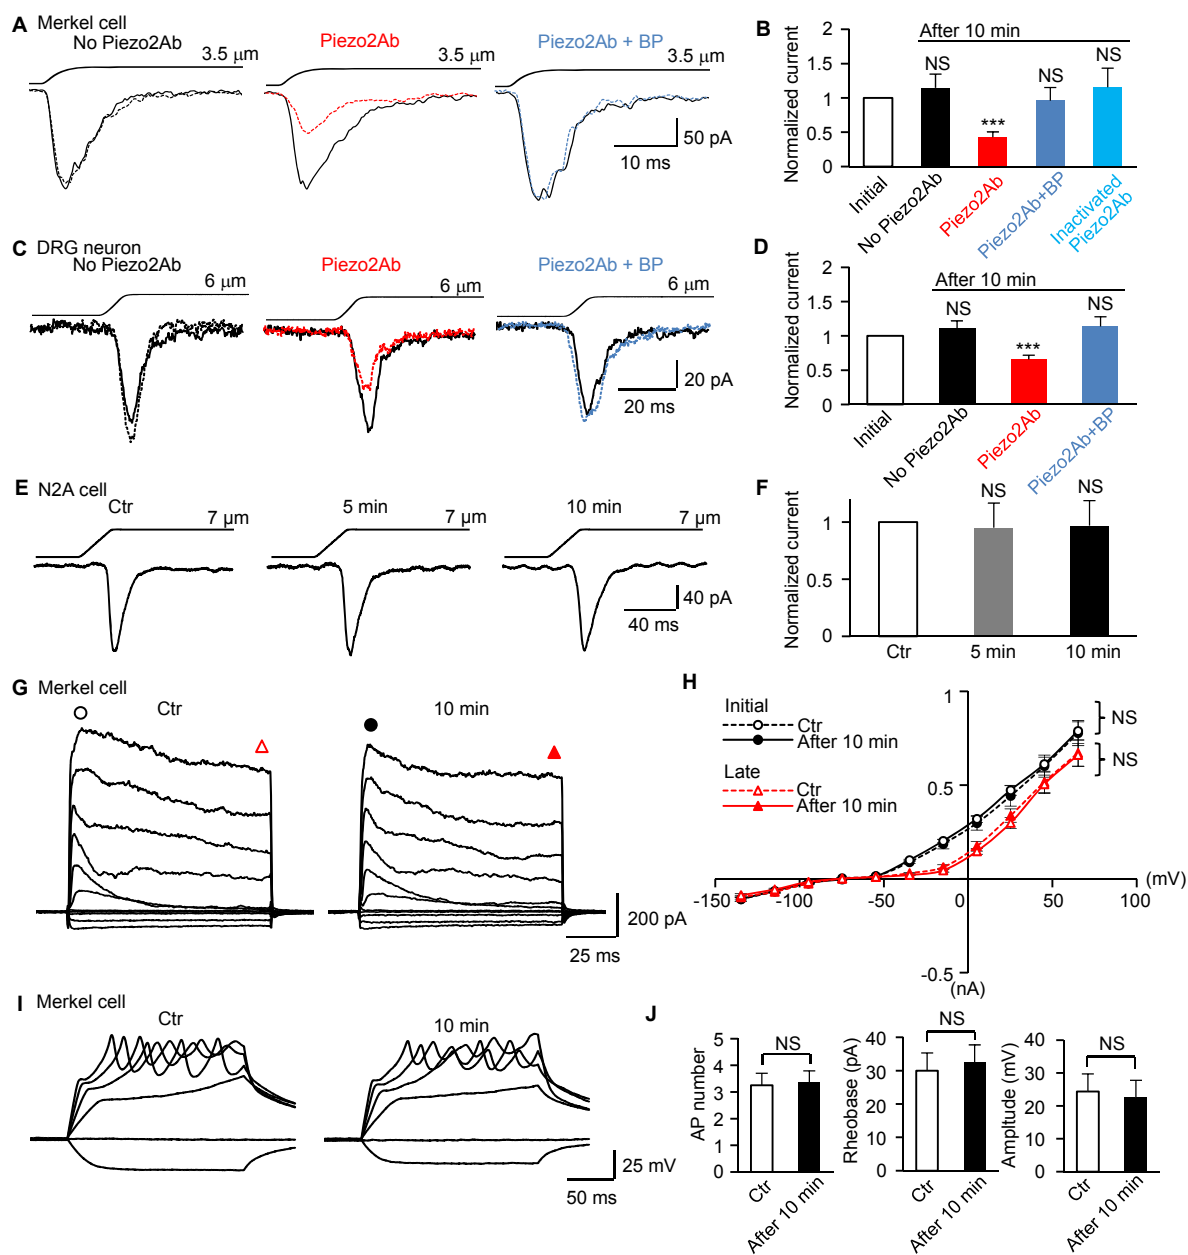

Figure S4

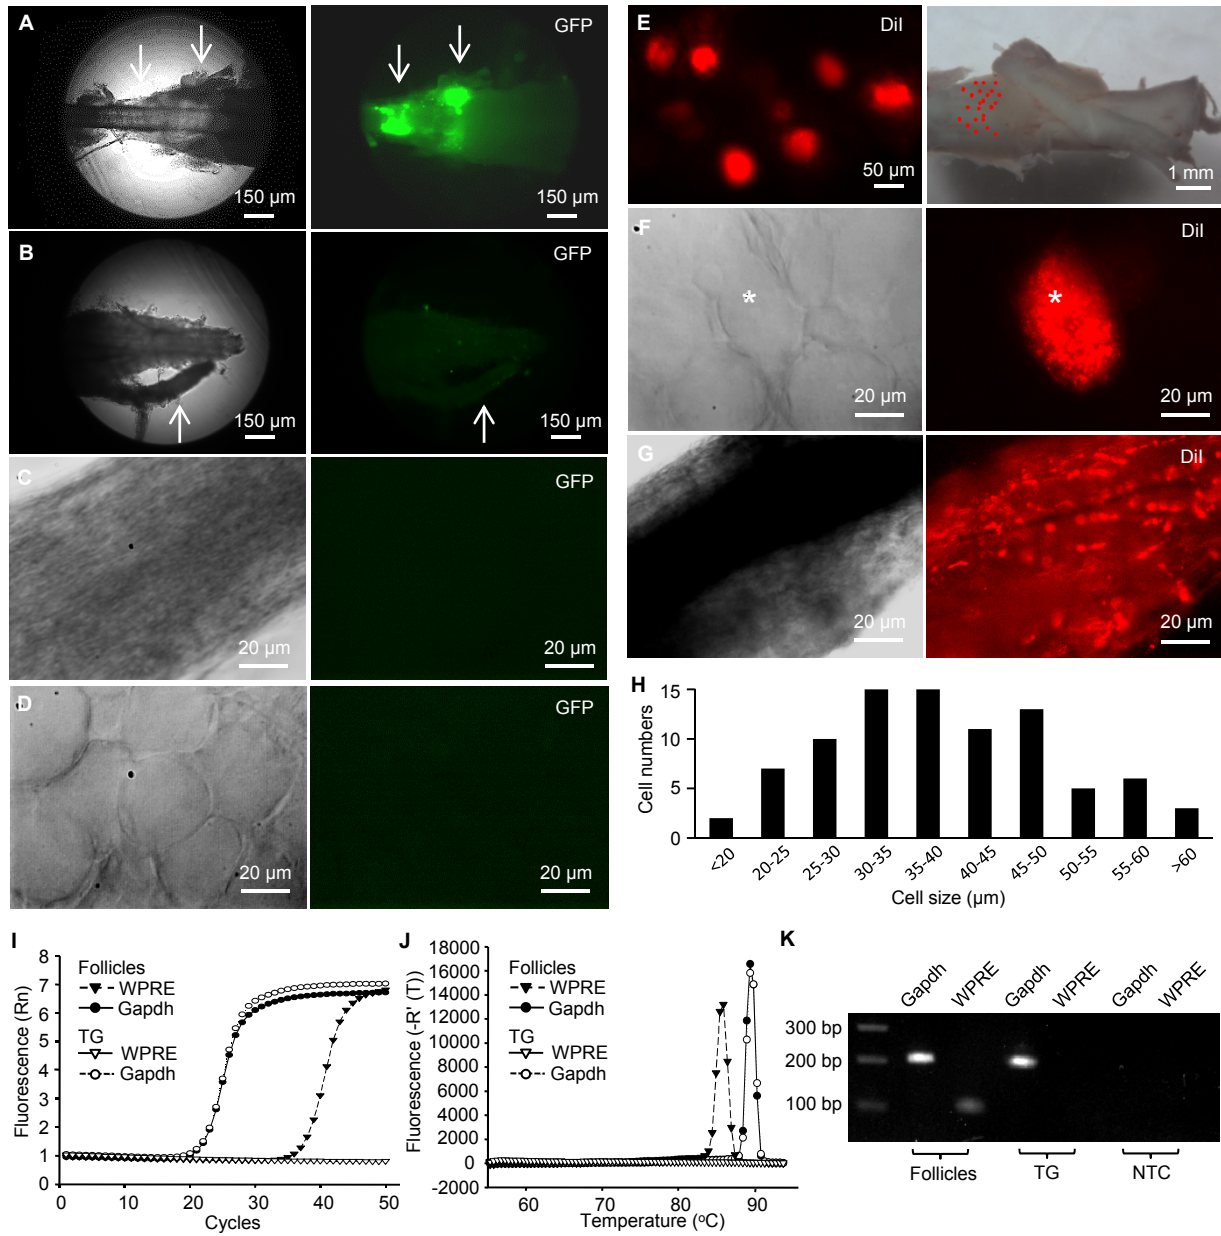

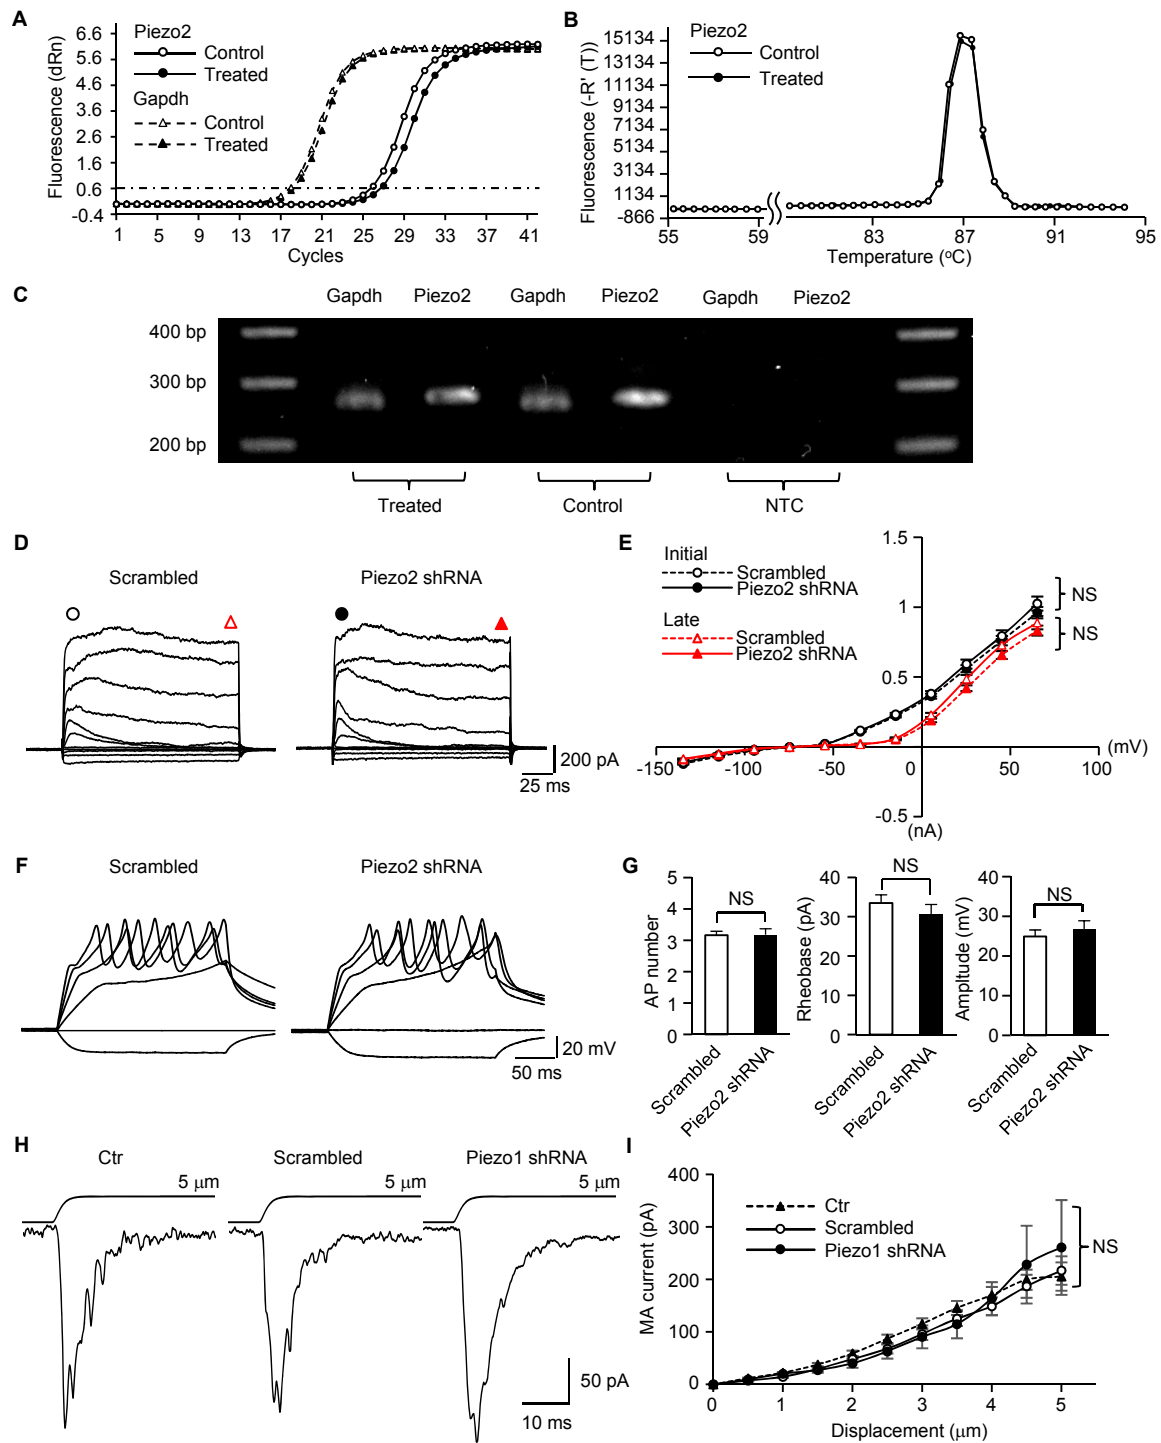

Figure S6

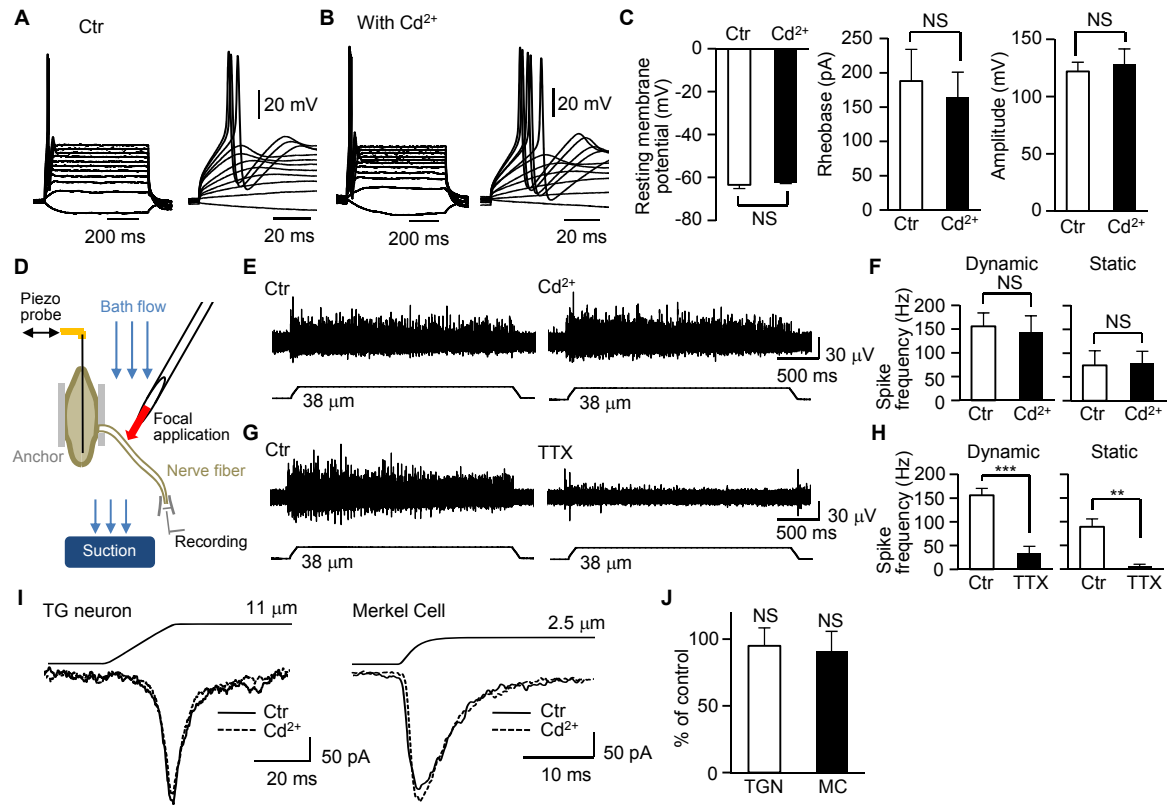

Figure S7

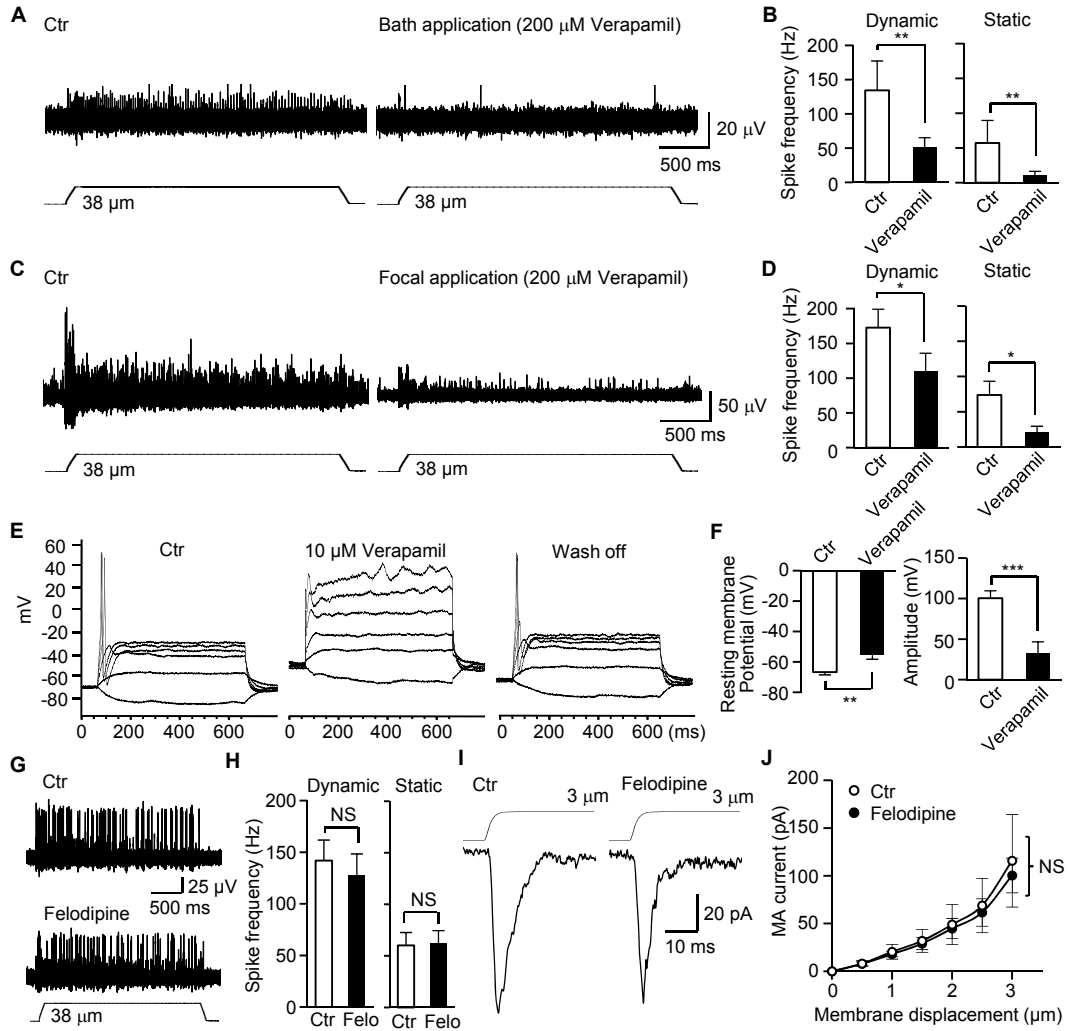

Supplement: NIHMS569432-supplement-02.pdf [file NIHMS569432-supplement-02.pdf]
